# Supplementary material
Source: PubMed Central journal article supplement (PMC4128386)

identified in whole mount preparations of recipient mouse seminiferous tubules using the rabbit anti-primate antibody. Colonies in each recipient testis were counted and normalized to  $10^5$  viable cells transplanted per testis. **(A and B)** For THY1 and EPCAM, no significant difference was found between the unsorted cells and the sorted fractions ( $P>0.05$ ). **(C)** ITGA6 positive fraction was enriched roughly 3 fold compared to unsorted cells ( $P<0.05$ ). Bar graphs are presented as mean  $\pm$  SEM. Scale bar = 100  $\mu$ m.

**Supplementary figure 1.** Isotype controls for **(A)** ZBTB16 and SALL4, **(B)** UTF1 and SALL4, **(C)** SALL4 and KIT, **(D)** UTF1 and KIT, **(E)** UTF1 and UCHL1, **(F)** KIT and UCHL1, **(G)** ENO2 and UCHL1, **(H)** ENO2 and SALL4. Scale bars = 100  $\mu$ m.

**Supplementary figure 2. Summary of marker expression in adult human testis.** Colored bars indicate the overlap of markers based on data from Figure 1. Shaded area indicates range in data. UTF1 seems to be the most restricted marker of human spermatogonia, followed by ZBTB16 and SALL4. There is also almost no overlap between these markers and differentiation marker KIT. UCHL1 and ENO2 are more widely expressed on the basement membrane of the seminiferous tubule and have slightly more overlap with KIT.

**Supplementary figure 3. ITGA6, and EPCAM expression in adult human testis sections.** Immunofluorescence staining for ITGA6 **(A and C)** and EPCAM **(D and F)** in adult human testis. DAPI staining (blue) **(B and E)** identifies all the nuclei. Scale bars = 50  $\mu$ m.

**Supplementary figure 4.** Isotype controls for **(A)** THY1 and **(B)** ITGA1 FACS sorting. Negative gates were defined by analysis of human testis cells stained using **(A)** APC-conjugated and **(B)** PE-conjugated isotype control antibodies.

**Supplementary figure 5. Rabbit anti-primate antibody and ENO2 co-staining of recipient mouse testes xenotransplanted with human testis cells.** Immunofluorescence co-staining for the primate antibody (**A and C**) and ENO2 (**B and C**) in human to nude mouse xenotransplants testis. DAPI staining (blue) identifies all the nuclei. Scale bars = 50  $\mu\text{m}$ .

ACCEPTED MANUSCRIPT

Supplementary Table 1. Germ cell markers in rodents, non-human primates and humans.

|                   | Rodents |                  |    | Nonhuman primates |         |    | Humans |         |    | Comments                                                                                                | References                                 |
|-------------------|---------|------------------|----|-------------------|---------|----|--------|---------|----|---------------------------------------------------------------------------------------------------------|--------------------------------------------|
|                   | RT-PCR  | IHC ICC          | TR | RT-PCR            | IHC ICC | TR | RT-PCR | IHC ICC | TR |                                                                                                         |                                            |
| <b>Germ cell*</b> |         |                  |    |                   |         |    |        |         |    |                                                                                                         |                                            |
| ID4               | X       | IHC-XS<br>IHC-WM | X  |                   |         |    |        |         |    | A <sub>s</sub>                                                                                          | (18)                                       |
| EXOSC10           |         |                  |    |                   |         |    | X      | IHC-XS  |    | A <sub>d</sub>                                                                                          | (57)                                       |
| OCT2              |         |                  |    |                   |         |    |        | IHC-XS  |    | A <sub>d</sub>                                                                                          | (59)                                       |
| FGFR3             |         |                  |    |                   |         |    | X      | IHC-XS  |    | A <sub>d</sub> , A <sub>p</sub>                                                                         | (58)                                       |
| EGR3              |         | IHC-WM           |    |                   |         |    |        |         |    | A <sub>s</sub> , A <sub>pr</sub>                                                                        | (131)                                      |
| NANOS2            | X       | IHC-XS<br>IHC-WM | X  |                   |         |    |        | IHC-XS  |    | A <sub>s</sub> , A <sub>pr</sub> ,<br>A <sub>d</sub> , A <sub>p</sub> , B-RS                            | (30-32, 132, 133)                          |
| GFRa1             |         | IHC-XS<br>IHC-WM | X  |                   | IHC-XS  |    |        | IHC-XS  |    | A <sub>s</sub> -A <sub>al4</sub> ,<br>A <sub>d</sub> , A <sub>p</sub> , B <sub>1</sub> , B <sub>2</sub> | (49, 60-62, 75, 113,<br>116, 134)          |
| UTF1              | X       | IHC-XS           |    |                   |         |    | X      | IHC-XS  |    | A <sub>s</sub> -A <sub>al4</sub> ,<br>A <sub>d</sub> , A <sub>p</sub> , BM                              | (24, 55)                                   |
| ZBTB16            |         | IHC-XS<br>IHC-WM | X  |                   | IHC-XS  |    | X      | IHC-XS  |    | A <sub>s</sub> -A <sub>al</sub> ,<br>Ad, A <sub>p</sub> , B <sub>1</sub> , B <sub>2</sub> ,<br>BM       | (13, 14, 22, 60, 61,<br>75, 102, 103, 135) |
| SALL4             |         | IHC-XS<br>IHC-WM |    |                   | IHC-XS  |    | X      | IHC-XS  |    | A <sub>s</sub> -A <sub>al</sub> ,<br>A <sub>d</sub> , A <sub>p</sub> , B                                | (56, 102, 103, 135)                        |
| POU5F1<br>(OCT4)  |         | IHC-XS<br>IHC-WM | X  |                   | IHC-XS  |    |        |         |    | A <sub>s</sub> -A <sub>al</sub> ,<br>BM                                                                 | (136-138)                                  |
| POU3F1            |         | IHC-XS           | X  |                   |         |    |        |         |    | Spermatogonia<br>on the BM                                                                              | (37)                                       |
| RET               |         | IHC-XS           |    |                   |         |    |        |         |    | A <sub>s</sub> -A <sub>al</sub> ,                                                                       | (9)                                        |
| BCLB6             |         | IHC-XS           | X  |                   |         |    |        |         |    | Rare cells on<br>the BM. RS in<br>stage 7                                                               | (128, 139)                                 |
| LHX1              |         | IHC-XS           | X  |                   |         |    |        |         |    | Rare cells on<br>the BM. RS in<br>stage 7                                                               | (128)                                      |
| ETV5              |         | IHC-XS           | X  |                   |         |    |        |         |    | On the BM                                                                                               | (128)                                      |

|                  |   |                  |   |   |        |  |   |               |                                                                      |                                                             |
|------------------|---|------------------|---|---|--------|--|---|---------------|----------------------------------------------------------------------|-------------------------------------------------------------|
| NANOS3           | X | IHC-XS<br>IHC-WM |   |   |        |  |   |               | A <sub>s</sub> -A1                                                   | (30-33)                                                     |
| SOX3             |   | IHC-XS           |   |   |        |  |   |               | A <sub>s</sub> -Aal                                                  | (140)                                                       |
| GPR125           |   | IHC-XS<br>IHC-WM | X |   | IHC-XS |  | X | IHC-XS<br>ICC | A <sub>s</sub> -Aal, rare<br>cells on the BM                         | (20-22, 60, 135)                                            |
| LIN28<br>(TEX17) |   | IHC-XS<br>IHC-WM |   |   | IHC-XS |  |   | IHC-XS        | A <sub>s</sub> -Aal, rare<br>cells on the BM                         | (19, 63)                                                    |
| UCHL1<br>(UCHL1) |   | IHC-XS           |   |   | IHC-XS |  | X | IHC-XS        | Spermatogonia,<br>cells on the BM                                    | (22, 60, 135, 141)                                          |
| NGN3             |   | IHC-XS<br>IHC-WM | X |   | IHC-XS |  |   |               | A <sub>s</sub> -Aal,<br>A <sub>p</sub> , B <sub>1-4</sub> , PS       | (28, 29, 75, 140)                                           |
| SOHLH1           | X | IHC-XS<br>IHC-WM |   |   |        |  |   |               | GFR $\alpha$ 1 <sup>-</sup><br>spermatogonia                         | (34, 142)                                                   |
| SOHLH2           | X | IHC-XS<br>IHC-WM |   |   |        |  |   |               | GFR $\alpha$ 1 <sup>-</sup><br>spermatogonia                         | (34-36, 142)                                                |
| CBL              |   |                  |   |   |        |  | X | IHC-XS        | BM                                                                   | (54)                                                        |
| DSG2             |   |                  |   |   |        |  | X | IHC-XS        | BM                                                                   | (54)                                                        |
| SAGE1            |   |                  |   |   |        |  |   | IHC-XS        | B                                                                    | (59)                                                        |
| TRA-1-81         |   |                  |   |   | IHC-XS |  |   |               | Rare cells on<br>the BM                                              | (135, 143)                                                  |
| MAGEA4           |   |                  |   |   | IHC-XS |  |   | IHC-XS        | BM, some spc                                                         | (60, 62, 135, 136,<br>144)                                  |
| SNAP91           |   |                  |   |   |        |  | X | IHC-XS        | BM, some spc                                                         | (54)                                                        |
| RBM              | X | IHC-XS           |   |   |        |  |   | IHC-XS        | A <sub>s</sub> -A4<br>A <sub>d</sub> , A <sub>p</sub> , B-RS         | (145-149)                                                   |
| RAR $\alpha$     | X | IHC-XS<br>IHC-WM |   |   |        |  |   |               | A <sub>al</sub> -A1                                                  | (150)                                                       |
| KIT              | X | IHC-XS<br>IHC-WM | X | X | IHC-XS |  | X | IHC-XS        | A <sub>al</sub> -RS<br>A <sub>p</sub> , B <sub>1-4</sub> , PS,<br>BM | (60, 75, 76, 103,<br>112, 116, 151-155)<br>unpublished data |
| STRA8            | X | IHC-XS<br>IHC-WM | X |   |        |  |   |               | A <sub>s</sub> -RS                                                   | (156-158)                                                   |
| TAF4b            |   | IHC-XS           | X |   |        |  |   |               | A <sub>s</sub> -Spc                                                  | (159)                                                       |
| DAZL             | X | IHC-XS           |   |   | IHC-XS |  | X | IHC-XS        | A <sub>s</sub> -Spc                                                  | (22, 82, 160, 161)                                          |
| VASA             |   | IHC-XS           |   |   | IHC-XS |  | X |               | A <sub>s</sub> -RS                                                   | (22, 116, 135, 162,<br>163)                                 |
| mRNA-            |   | IHC-XS           | X |   |        |  |   |               | On the BM                                                            | (125)                                                       |

|                       |   |                  |   |   |        |   |   |               |   |                                                                                                         |                                                          |
|-----------------------|---|------------------|---|---|--------|---|---|---------------|---|---------------------------------------------------------------------------------------------------------|----------------------------------------------------------|
| 221/222               |   |                  |   |   |        |   |   |               |   |                                                                                                         |                                                          |
| mRNA-146              | X |                  |   |   |        |   |   |               |   | Undifferentiated spermatogonia                                                                          | (164)                                                    |
| mRNA-20               | X | IHC-XS           | X |   |        |   |   |               |   | Undifferentiated spermatogonia                                                                          | (165)                                                    |
| mRNA-106a             | X | IHC-XS           | X |   |        |   |   |               |   | Undifferentiated spermatogonia                                                                          | (165)                                                    |
| miRlet7               |   | IHC-XS           |   |   |        |   |   |               |   | On the BM                                                                                               | (166)                                                    |
|                       |   |                  |   |   |        |   |   |               |   |                                                                                                         |                                                          |
| <b>Cell-surface**</b> |   |                  |   |   |        |   |   |               |   |                                                                                                         |                                                          |
| GFRa1                 |   | IHC-XS<br>IHC-WM | X |   | IHC-XS |   |   | IHC-XS        |   | A <sub>s</sub> -A <sub>al4</sub> ,<br>A <sub>d</sub> , A <sub>p</sub> , B <sub>1</sub> , B <sub>2</sub> | (49, 60-62, 75, 113, 116, 134)                           |
| KIT                   | X | IHC-XS<br>IHC-WM | X | X | IHC-XS |   | X | IHC-XS        |   | A <sub>al</sub> -RS<br>A <sub>p</sub> , B <sub>1-4</sub> , PS,<br>BM                                    | (60, 75, 76, 103, 112, 116, 151-155)                     |
| THY1 (CD90)           |   |                  | X |   |        | X |   | IHC-XS        | X |                                                                                                         | (15, 25, 60, 75, 76, 84, 116)<br>unpublished data        |
| CDH1 (CD324)          |   | IHC-XS<br>IHC-WM | X |   |        |   |   |               |   | A <sub>s</sub> -A <sub>al</sub>                                                                         | (17, 167)                                                |
| CD9                   |   | IHC-XS           | X |   |        |   |   | IHC-XS        | X | BM                                                                                                      | (26, 27, 62, 119)                                        |
| CD29 (β1-integrin)    |   |                  | X |   |        |   | X | IHC-XS        |   | BM                                                                                                      | (16, 23, 151)                                            |
| CD49f (ITGA6)         |   |                  | X |   | IHC-XS |   | X | IHC-XS<br>ICC | X | BM                                                                                                      | (16, 60, 76, 84, 112, 116, 124, 151)<br>unpublished data |
| EPCAM                 |   | IHC-XS           | X |   |        |   | X |               | X |                                                                                                         | (22, 25, 26, 81, 168) unpublished data                   |
| SSEA4                 |   |                  |   |   | IHC-XS | X |   | IHC-XS        | X |                                                                                                         | (76, 116, 135, 143, 169)                                 |
| GPR125                |   | IHC-XS<br>IHC-WM | X |   | IHC-XS |   | X | IHC-XS<br>ICC |   | A <sub>s</sub> -A <sub>al</sub> , rare cells on the BM                                                  | (20-22, 60, 135)                                         |

\* We attempted to sort the germ cell markers in the order of their expression from undifferentiated to differentiating spermatogonia

\*\* Examined with flow cytometry or FACS experiments. FGFR3 and TRA-1-81 are also cell surface markers but not included here because they have not been studied in the context of flow cytometry or FACS.

Abbreviations: IHC-XS, immunohistochemistry cross-section; IHC-WM, immunohistochemistry whole-mount; ICC, immunocytochemistry; TR, transplant; As, A single spermatogonia; Apr, A paired spermatogonia; Aal, A aligned spermatogonia; Ad, A dark spermatogonia; Ap, A pale spermatogonia; B, type B spermatogonia; Spc, spermatocytes; RS, round spermatids; PS, pachytene spermatocytes; BM, basement membrane

ACCEPTED MANUSCRIPT

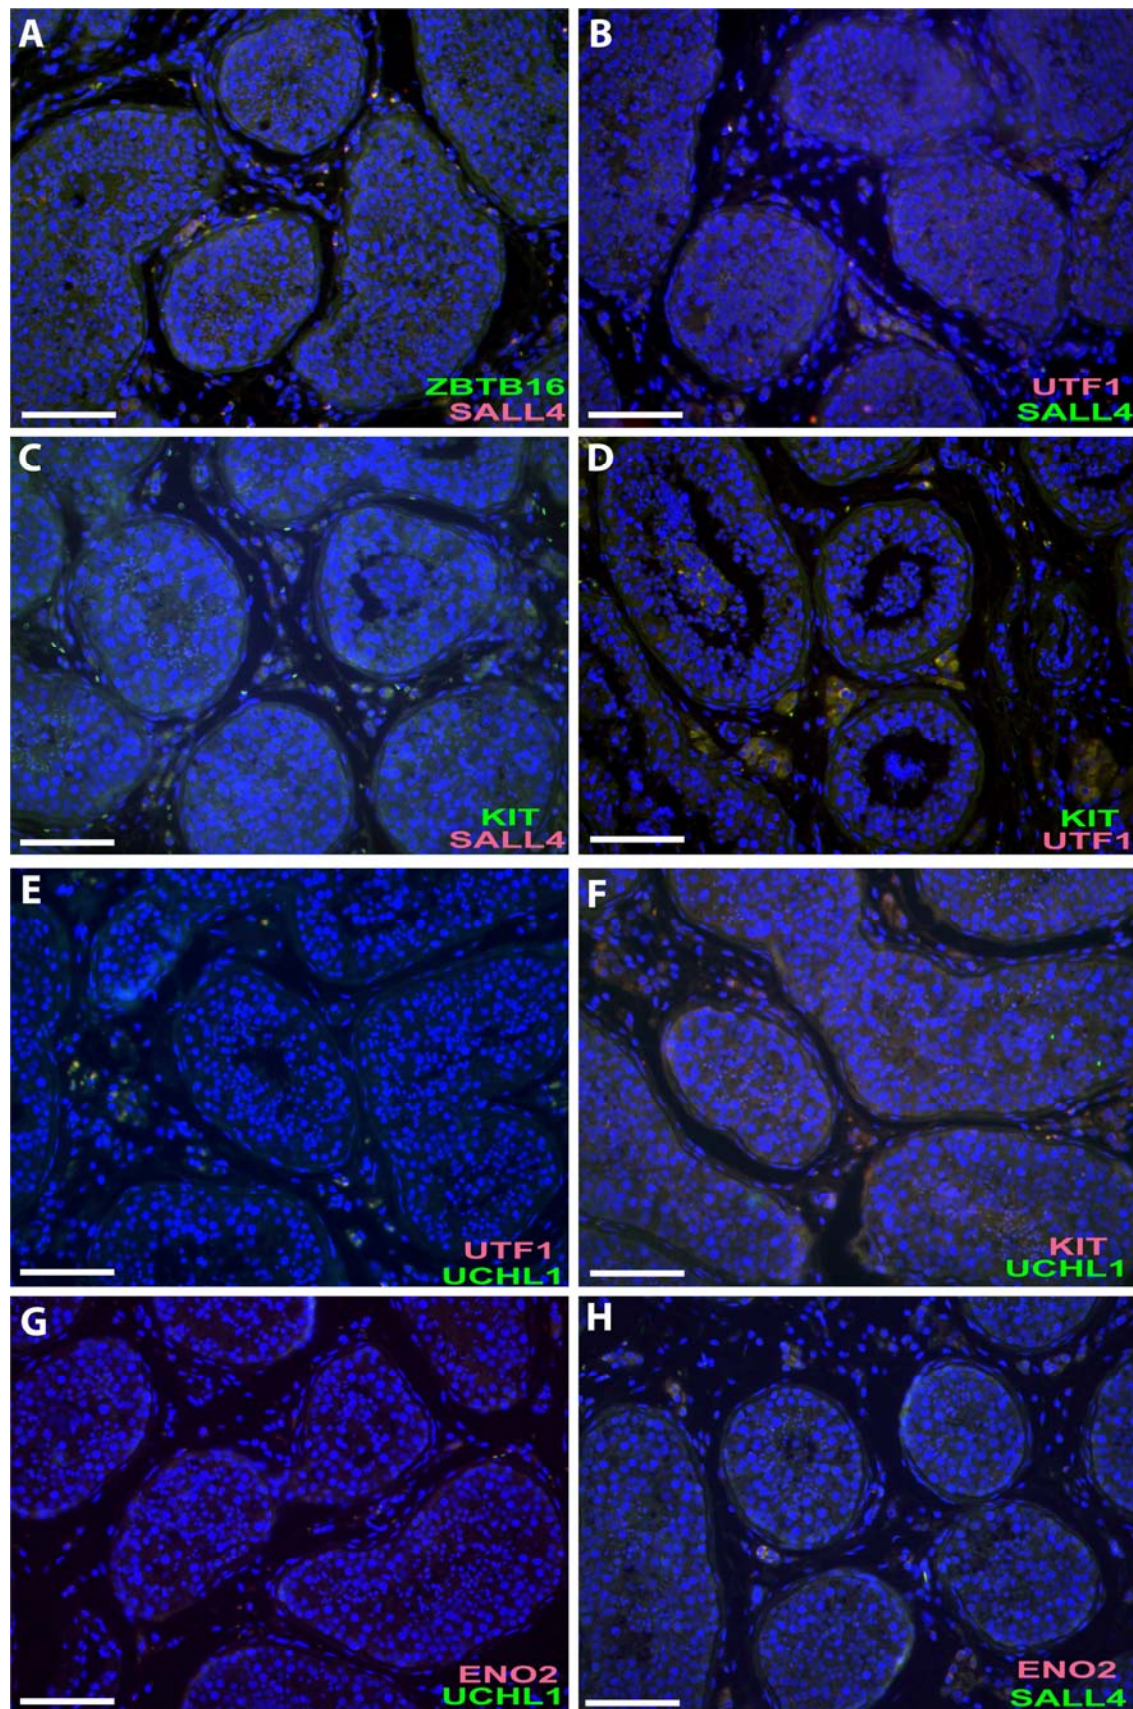

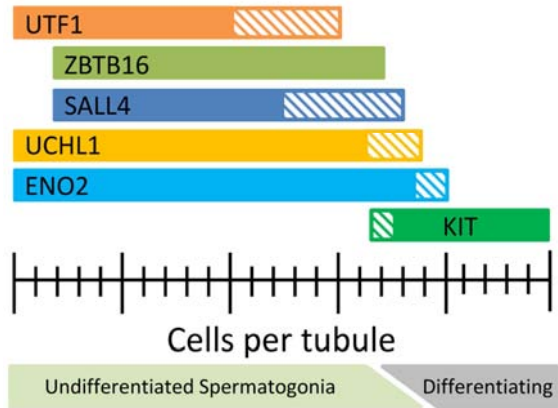



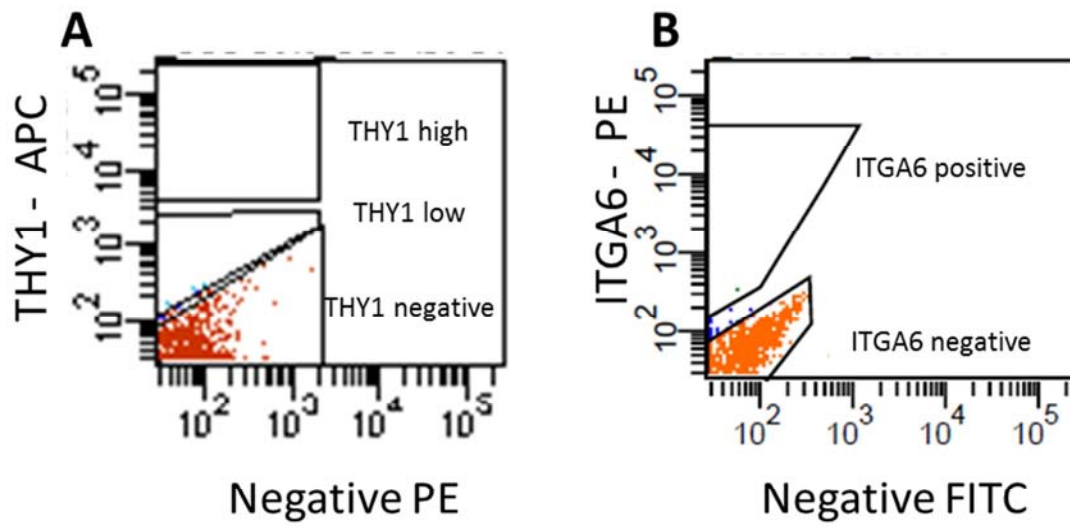

ACCEPTED MANUSCRIPT

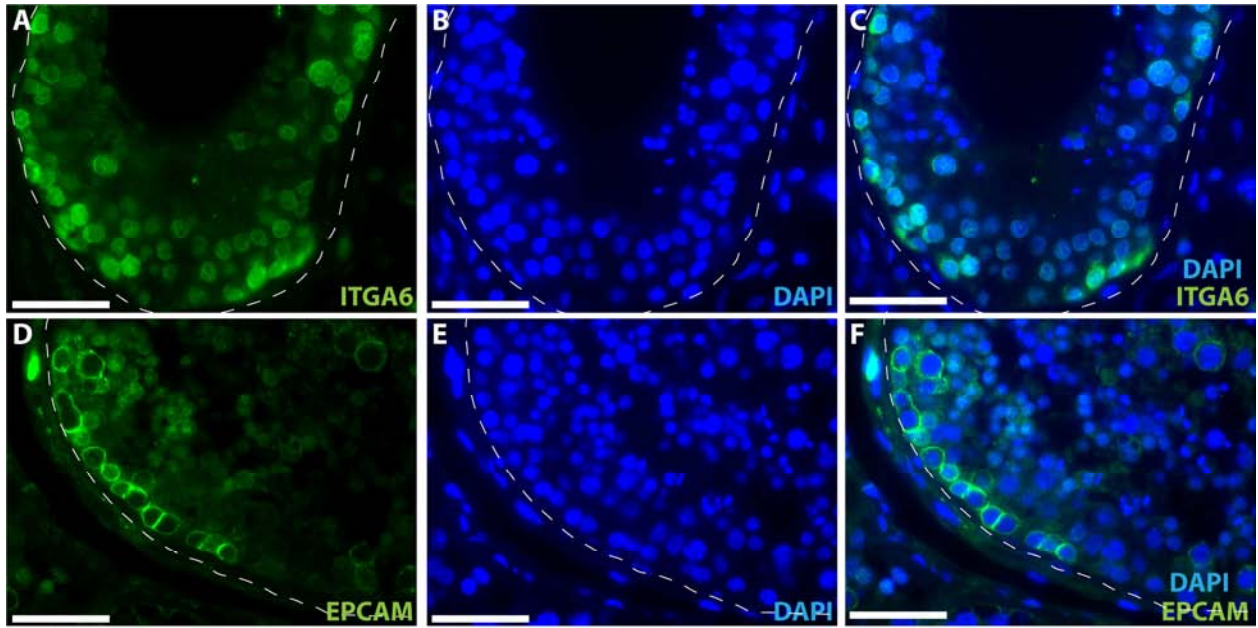

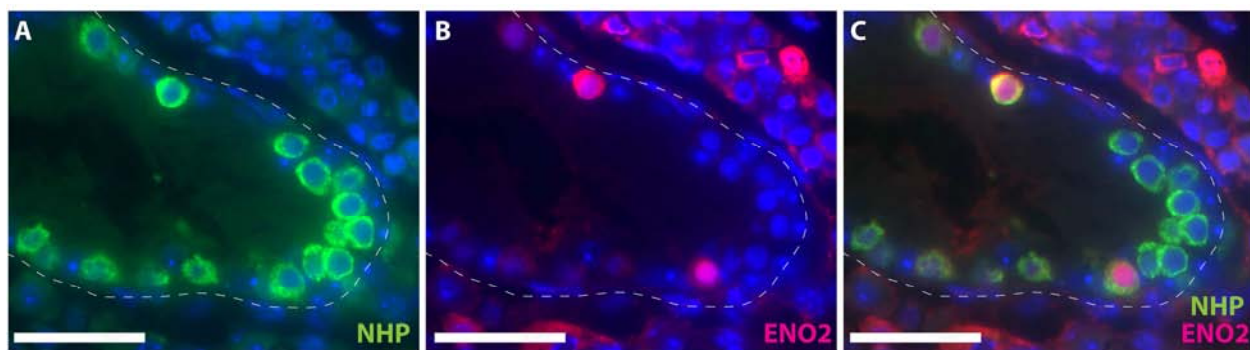

Supplement: NIHMS602406-supplement-supplement_1.pdf [file NIHMS602406-supplement-supplement_1.pdf]
